# Supplementary material for: Human More Complex than Mouse at Cellular Level
Source: PubMed Central journal article supplement (PMC3404003; doi:10.1371/journal.pone.0041753), 2012-07-24
Supplement: pone.0041753.s001.pdf [file pone.0041753.s001.pdf]

Table S1. The results of the general linear model (GLM, with the total number of expressed genes being added as continuous variable) for the number of expressed C2H2-ZF(-KRAB) genes.

| Factor                   | all C2H2-ZF genes |                  |                                | C2H2-ZF-KRAB genes |                   |                             |
|--------------------------|-------------------|------------------|--------------------------------|--------------------|-------------------|-----------------------------|
|                          | <i>F</i> -ratio   | <i>P</i>         | Number of genes                | <i>F</i> -ratio    | <i>P</i>          | Number of genes             |
| human versus mouse       | 44.41             | 10 <sup>-9</sup> | 158.6 (±11.9)<br>125.0 (±13.8) | 76.91              | 10 <sup>-16</sup> | 58.8 (±7.6)<br>30.4 (±8.9)  |
| embryo versus non-embryo | 11.65             | 0.001            | 151.8 (±15.3)<br>131.8 (±10.7) | 5.65               | 0.02              | 49.4 (±9.8)<br>40.1 (±6.9)  |
| brain versus non-brain   | 6.37              | 0.011            | 148.8 (±15.2)<br>134.8 (±10.6) | 7.35               | 0.007             | 49.4 (±9.7)<br>39.8 (±6.8)  |
| cancer versus non-cancer | 12.10             | 0.001            | 131.7 (±15.5)<br>151.9 (±10.4) | 19.70              | 10 <sup>-5</sup>  | 36.3 (±9.9)<br>52.9 (±6.7)  |
| mixed versus non-mixed   | 0.03              | 0.85             | 142.6 (±19.3)<br>141.0 (±8.0)  | 0.45               | 0.5               | 42.7 (±12.3)<br>46.5 (±5.1) |

*F*-ratios, significance levels, and the least squares mean numbers of these genes, with 95% confidence intervals.
