# Supplementary material for: Human More Complex than Mouse at Cellular Level
Source: PubMed Central journal article supplement (PMC3404003; doi:10.1371/journal.pone.0041753), 2012-07-24
Supplement: pone.0041753.s002.pdf [file pone.0041753.s002.pdf]

Table S2. The results of multifactor analysis of variance (ANOVA) for the residuals of the linear regression of the number of expressed C2H2-ZF(-KRAB) genes on the total number of expressed genes. The residuals are negative and positive values distributed around zero mean.

| Factor                   | all C2H2-ZF genes |                  |                                   | C2H2-ZF-KRAB genes |                   |                                   |
|--------------------------|-------------------|------------------|-----------------------------------|--------------------|-------------------|-----------------------------------|
|                          | <i>F</i> -ratio   | <i>P</i>         | Residuals                         | <i>F</i> -ratio    | <i>P</i>          | Residuals                         |
| human versus mouse       | 41.41             | 10 <sup>-8</sup> | 18.35 (±15.61)<br>-13.45 (±18.23) | 72.58              | 10 <sup>-16</sup> | 10.21 (±10.03)<br>-16.85 (±11.71) |
| embryo versus non-embryo | 11.03             | 0.001            | 12.20 (±20.24)<br>-7.31 (±14.15)  | 5.15               | 0.02              | 0.96 (±13.01)<br>-7.60 (±9.09)    |
| brain versus non-brain   | 6.67              | 0.010            | 9.60 (±20.04)<br>-4.71 (±13.98)   | 7.69               | 0.005             | 1.62 (±12.88)<br>-8.26 (±8.98)    |
| cancer versus non-cancer | 10.24             | 0.001            | -6.71 (±20.45)<br>11.60 (±13.59)  | 16.99              | 10 <sup>-4</sup>  | -10.89 (±13.16)<br>4.25 (±8.73)   |
| mixed versus non-mixed   | 0.00              | 0.95             | 2.15 (±25.35)<br>2.74 (±10.48)    | 0.93               | 0.34              | -6.03 (±16.29)<br>-0.61 (±6.73)   |

*F*-ratios, significance levels, and the least squares mean residual values, with 95% confidence intervals.
