# Supplementary material for: Human More Complex than Mouse at Cellular Level
Source: PubMed Central journal article supplement (PMC3404003; doi:10.1371/journal.pone.0041753), 2012-07-24
Supplement: pone.0041753.s003.pdf [file pone.0041753.s003.pdf]

Table S3. The results of multifactor analysis of variance (ANOVA) for the percentage of expressed C2H2-ZF(-KRAB) genes (in relation to all expressed genes) determined using the PFAM database.

| Factor                   | all C2H2-ZF genes |                  |                              | C2H2-ZF-KRAB genes |                   |                              |
|--------------------------|-------------------|------------------|------------------------------|--------------------|-------------------|------------------------------|
|                          | <i>F</i> -ratio   | P                | Percentage of genes          | <i>F</i> -ratio    | <i>P</i>          | Percentage of genes          |
| human versus mouse       | 43.01             | 10 <sup>-9</sup> | 2.90 (±0.33)<br>2.21 (±0.39) | 86.65              | 10 <sup>-16</sup> | 1.24 (±0.21)<br>0.63 (±0.24) |
| embryo versus non-embryo | 11.46             | 0.001            | 2.77 (±0.43)<br>2.34 (±0.30) | 7.10               | 0.008             | 1.04 (±0.27)<br>0.83 (±0.19) |
| brain versus non-brain   | 8.17              | 0.005            | 2.73 (±0.39)<br>2.39 (±0.30) | 8.55               | 0.004             | 1.05 (±0.27)<br>0.83 (±0.18) |
| cancer versus non-cancer | 12.14             | 10 <sup>-4</sup> | 2.27 (±0.43)<br>2.84 (±0.29) | 26.96              | 10 <sup>-6</sup>  | 0.74 (±0.27)<br>1.13 (±0.18) |
| mixed versus non-mixed   | 0.35              | 0.64             | 2.63 (±0.54)<br>2.48 (±0.22) | 0.11               | 0.74              | 0.92 (±0.34)<br>0.95 (±0.14) |

*F*-ratios, significance levels, and the least squares mean percentages of these genes, with 95% confidence intervals.
