# Supplementary material for: Human More Complex than Mouse at Cellular Level
Source: PubMed Central journal article supplement (PMC3404003; doi:10.1371/journal.pone.0041753), 2012-07-24
Supplement: pone.0041753.s004.pdf [file pone.0041753.s004.pdf]

Table S4. The comparison of the percentages of expressed C2H2-ZF genes (in relation to all expressed genes) in the homologous human and mouse tissues.

| Tissue   | Percentage of genes |                     | P for difference |
|----------|---------------------|---------------------|------------------|
|          | human               | mouse               |                  |
| brain    | 3.17 ( $\pm 0.35$ ) | 2.59 ( $\pm 0.31$ ) | 0.01             |
| kidney   | 3.15 ( $\pm 0.67$ ) | 1.82 ( $\pm 1.24$ ) | 0.02             |
| liver    | 2.66 ( $\pm 2.81$ ) | 1.24 ( $\pm 2.92$ ) | 0.05             |
| pancreas | 2.95 ( $\pm 0.68$ ) | 1.73 ( $\pm 3.36$ ) | 0.12             |
| testis   | 3.57 ( $\pm 1.02$ ) | 1.83 ( $\pm 1.09$ ) | 0.01             |
