# Supplementary material for: Human More Complex than Mouse at Cellular Level
Source: PubMed Central journal article supplement (PMC3404003; doi:10.1371/journal.pone.0041753), 2012-07-24
Supplement: pone.0041753.s005.pdf [file pone.0041753.s005.pdf]

Table S5. The comparison of the percentages of expressed C2H2-ZF-KRAB genes (in relation to all expressed genes) in the homologous human and mouse tissues.

| Tissue   | Percentage of genes |                     | P for difference  |
|----------|---------------------|---------------------|-------------------|
|          | human               | mouse               |                   |
| brain    | 1.34 ( $\pm 0.23$ ) | 0.71 ( $\pm 0.13$ ) | $2 \cdot 10^{-5}$ |
| kidney   | 1.15 ( $\pm 0.49$ ) | 0.57 ( $\pm 1.04$ ) | 0.09              |
| liver    | 0.86 ( $\pm 1.75$ ) | 0.25 ( $\pm 1.85$ ) | 0.09              |
| pancreas | 0.93 ( $\pm 0.42$ ) | 0.47 ( $\pm 3.22$ ) | 0.14              |
| testis   | 1.62 ( $\pm 0.68$ ) | 0.62 ( $\pm 0.40$ ) | 0.01              |
