# Supplementary material for: Human More Complex than Mouse at Cellular Level
Source: PubMed Central journal article supplement (PMC3404003; doi:10.1371/journal.pone.0041753), 2012-07-24
Supplement: pone.0041753.s006.pdf [file pone.0041753.s006.pdf]

Table S6 (List A). The human C2H2-ZF genes presented in the transcriptome of normal tissues and absent in the cancer tissues. (Ranking by the total EST count of a given gene normalized by the library sizes.)

| EntrezGene | Count |
|------------|-------|
| 7768       | 37.58 |
| 346157     | 36.26 |
| 50943      | 34.87 |
| 646        | 30.62 |
| 65243      | 25.12 |
| 128209     | 20.59 |
| 285346     | 16.10 |
| 56979      | 13.85 |
| 389549     | 12.72 |
| 654254     | 9.92  |
| 201516     | 9.46  |
| 7638       | 9.09  |
| 728116     | 8.18  |
| 10661      | 8.15  |
| 347741     | 7.81  |
| 168417     | 7.01  |
| 7652       | 5.52  |
| 7634       | 4.97  |
| 148198     | 4.21  |
| 170960     | 4.18  |
| 100287429  | 4.17  |
| 57615      | 3.69  |
| 136259     | 3.53  |
| 219578     | 3.17  |
| 442319     | 2.85  |
| 90827      | 2.62  |
| 100132396  | 2.27  |
| 342933     | 2.26  |
| 728361     | 2.26  |
| 158506     | 1.70  |
| 221527     | 1.42  |
| 100131390  | 1.14  |
