# Supplementary material for: Human More Complex than Mouse at Cellular Level
Source: PubMed Central journal article supplement (PMC3404003; doi:10.1371/journal.pone.0041753), 2012-07-24
Supplement: pone.0041753.s007.pdf [file pone.0041753.s007.pdf]

Table S7 (List B). The human C2H2-ZF genes overrepresented in the transcriptome of normal tissues compared with the cancer tissues. (Ranking by the ratio of the EST count in the normal tissues to the count in the cancer tissues. Genes with the ratio above three-fold are shown. The counts were normalized by the number and the sizes of the EST libraries.)

| EntrezGene | Ratio |
|------------|-------|
| 55079      | 30.49 |
| 113835     | 22.96 |
| 7597       | 21.15 |
| 147929     | 16.58 |
| 84891      | 14.55 |
| 255877     | 13.87 |
| 342908     | 13.71 |
| 57573      | 11.26 |
| 64919      | 10.63 |
| 169841     | 10.22 |
| 79673      | 8.50  |
| 347344     | 8.14  |
| 643836     | 7.92  |
| 7789       | 7.55  |
| 339318     | 6.94  |
| 53336      | 6.86  |
| 7738       | 6.73  |
| 163115     | 6.67  |
| 148254     | 6.52  |
| 203523     | 6.42  |
| 11279      | 6.29  |
| 84436      | 6.24  |
| 284349     | 6.24  |
| 729288     | 6.22  |
| 84107      | 6.18  |
| 54796      | 6.06  |
| 158431     | 5.94  |
| 219749     | 5.91  |
| 92283      | 5.90  |
| 79891      | 5.65  |
| 284370     | 5.62  |
| 7745       | 5.40  |
| 6299       | 5.39  |
| 7718       | 5.33  |
| 151126     | 5.30  |
| 167465     | 5.20  |
| 9745       | 5.08  |
| 252884     | 4.99  |
| 7762       | 4.97  |
| 100289635  | 4.88  |
| 390980     | 4.77  |
| 7710       | 4.70  |
| 79898      | 4.69  |
| 284312     | 4.69  |

|        |      |
|--------|------|
| 26137  | 4.68 |
| 25925  | 4.63 |
| 158399 | 4.56 |
| 7592   | 4.54 |
| 140883 | 4.50 |
| 7730   | 4.46 |
| 170691 | 4.38 |
| 125893 | 4.38 |
| 7490   | 4.22 |
| 7562   | 4.19 |
| 148266 | 4.13 |
| 80032  | 4.12 |
| 641339 | 4.12 |
| 388536 | 4.07 |
| 79973  | 4.07 |
| 7539   | 4.05 |
| 27107  | 4.05 |
| 282890 | 4.01 |
| 339324 | 4.01 |
| 126070 | 3.99 |
| 83744  | 3.95 |
| 9668   | 3.95 |
| 7700   | 3.94 |
| 11244  | 3.93 |
| 9839   | 3.88 |
| 80108  | 3.86 |
| 80095  | 3.86 |
| 6935   | 3.81 |
| 163255 | 3.79 |
| 64288  | 3.78 |
| 284391 | 3.76 |
| 124961 | 3.67 |
| 57711  | 3.60 |
| 64376  | 3.59 |
| 199704 | 3.59 |
| 168374 | 3.54 |
| 63978  | 3.52 |
| 8328   | 3.52 |
| 162993 | 3.49 |
| 57336  | 3.49 |
| 221895 | 3.48 |
| 7773   | 3.47 |
| 163051 | 3.43 |
| 163049 | 3.42 |
| 158586 | 3.38 |
| 65251  | 3.38 |
| 6297   | 3.28 |
| 51276  | 3.26 |
| 148268 | 3.25 |
| 285676 | 3.24 |
